# Supplementary material for: Characterization and Antimicrobial Resistance of Environmental and Clinical Aeromonas Species Isolated from Fresh Water Ornamental Fish and Associated Farming Environment in Sri Lanka
Source: MDPI journal article supplement (doi:10.3390/microorganisms9102106), 2021-10-06
Supplement: s1 [file s1]

**Table S1.** Origin and species **distribution diversity** of *Aeromonas* isolates

|    | <b>Isolate</b> | <b>Source</b>                                    | <b>Species</b>              |
|----|----------------|--------------------------------------------------|-----------------------------|
| 1  | AE1            | Effluent water                                   | <i>Aeromonas veronii</i>    |
| 2  | AE2            | Pond sediment                                    | <i>Aeromonas veronii</i>    |
| 3  | AH3            | Skin mucous of apparently healthy guppy          | <i>Aeromonas hydrophila</i> |
| 4  | AH4            | Skin mucous of apparently healthy swordtail fish | <i>Aeromonas veronii</i>    |
| 5  | AE5            | Biofilm                                          | <i>Aeromonas veronii</i>    |
| 6  | AE6            | Biofilm                                          | <i>Aeromonas veronii</i>    |
| 7  | AE7            | Effluent water                                   | <i>Aeromonas veronii</i>    |
| 8  | AE8            | Pond sediment                                    | <i>Aeromonas veronii</i>    |
| 9  | AH9            | Skin mucous of apparently healthy guppy          | <i>Aeromonas veronii</i>    |
| 10 | AH10           | Skin mucous of apparently healthy goldfish       | <i>Aeromonas veronii</i>    |
| 11 | AE12           | Effluent water                                   | <i>Aeromonas veronii</i>    |
| 12 | AH15           | Skin mucous of apparently healthy goldfish       | <i>Aeromonas veronii</i>    |
| 13 | AE19           | Pond sediment                                    | <i>Aeromonas veronii</i>    |
| 14 | AH20           | Skin mucous of apparently healthy guppy          | <i>Aeromonas veronii</i>    |
| 15 | AH21           | Skin mucous of apparently healthy guppy          | <i>Aeromonas hydrophila</i> |
| 16 | AH22           | Skin mucous of apparently healthy goldfish       | <i>Aeromonas veronii</i>    |
| 17 | AH23           | Skin mucous of apparently healthy goldfish       | <i>Aeromonas veronii</i>    |
| 18 | AE26           | Effluent water                                   | <i>Aeromonas veronii</i>    |
| 19 | AE28           | Effluent water                                   | <i>Aeromonas veronii</i>    |
| 20 | AE29           | Pond sediment                                    | <i>Aeromonas veronii</i>    |
| 21 | AH31           | Skin mucous of apparently healthy guppy          | <i>Aeromonas veronii</i>    |
| 22 | AE32           | Effluent water                                   | <i>Aeromonas veronii</i>    |
| 23 | AE33           | Pond sediment                                    | <i>Aeromonas veronii</i>    |
| 24 | AE34           | Pond sediment                                    | <i>Aeromonas veronii</i>    |
| 25 | AE35           | Pond sediment                                    | <i>Aeromonas veronii</i>    |
| 26 | AH37           | Skin mucous of apparently healthy guppy          | <i>Aeromonas media</i>      |
| 27 | AH38           | Skin mucous of apparently healthy guppy          | <i>Aeromonas veronii</i>    |
| 28 | AE39           | Pond sediment                                    | <i>Aeromonas veronii</i>    |
| 29 | AE40           | Pond sediment                                    | <i>Aeromonas veronii</i>    |
| 30 | AE41           | Pond sediment                                    | <i>Aeromonas caviae</i>     |
| 31 | AE42           | Biofilm                                          | <i>Aeromonas veronii</i>    |
| 32 | AE43           | Biofilm                                          | <i>Aeromonas veronii</i>    |
| 33 | AH44           | Skin mucous of apparently healthy guppy          | <i>Aeromonas veronii</i>    |
| 34 | AE46           | Pond sediment                                    | <i>Aeromonas veronii</i>    |
| 35 | AH49           | Skin mucous of apparently healthy guppy          | <i>Aeromonas veronii</i>    |
| 36 | AH50           | Skin mucous of apparently healthy guppy          | <i>Aeromonas veronii</i>    |
| 37 | AE52           | Effluent water                                   | <i>Aeromonas veronii</i>    |
| 38 | AE53           | Pond sediment                                    | <i>Aeromonas veronii</i>    |
| 39 | AE54           | Pond sediment                                    | <i>Aeromonas veronii</i>    |
| 40 | AE56           | Biofilm                                          | <i>Aeromonas caviae</i>     |
| 41 | AH57           | Skin mucous of apparently healthy molly          | <i>Aeromonas veronii</i>    |
| 42 | AH58           | Skin mucous of apparently healthy molly          | <i>Aeromonas veronii</i>    |
| 43 | AH59           | Skin mucous of apparently healthy platy fish     | <i>Aeromonas caviae</i>     |
| 44 | AE60           | Effluent water                                   | <i>Aeromonas veronii</i>    |
| 45 | AE61           | Pond sediment                                    | <i>Aeromonas veronii</i>    |
| 46 | AE62           | Pond sediment                                    | <i>Aeromonas veronii</i>    |
| 47 | AH63           | Skin mucous of apparently healthy platy fish     | <i>Aeromonas veronii</i>    |
| 48 | AE65           | Biofilm                                          | <i>Aeromonas veronii</i>    |

|    |       |                                                  |                            |
|----|-------|--------------------------------------------------|----------------------------|
| 49 | AE66  | Effluent water                                   | <i>Aeromonas veronii</i>   |
| 50 | AE67  | Effluent water                                   | <i>Aeromonas veronii</i>   |
| 51 | AE68  | Pond sediment                                    | <i>Aeromonas veronii</i>   |
| 52 | AE70  | Pond sediment                                    | <i>Aeromonas veronii</i>   |
| 53 | AH71  | Skin mucous of apparently healthy platy fish     | <i>Aeromonas veronii</i>   |
| 54 | AH72  | Skin mucous of apparently healthy swordtail fish | <i>Aeromonas veronii</i>   |
| 55 | AE73  | Biofilm                                          | <i>Aeromonas veronii</i>   |
| 56 | AE74  | Effluent water                                   | <i>Aeromonas veronii</i>   |
| 57 | AE75  | Pond sediment                                    | <i>Aeromonas veronii</i>   |
| 58 | AE76  | Pond sediment                                    | <i>Aeromonas veronii</i>   |
| 59 | AE77  | Biofilm                                          | <i>Aeromonas veronii</i>   |
| 60 | AE79  | Effluent water                                   | <i>Aeromonas veronii</i>   |
| 61 | AE80  | Pond sediment                                    | <i>Aeromonas veronii</i>   |
| 62 | AE81  | Pond sediment                                    | <i>Aeromonas veronii</i>   |
| 63 | AE82  | Pond sediment                                    | <i>Aeromonas veronii</i>   |
| 64 | AH83  | Skin mucous of apparently healthy platy fish     | <i>Aeromonas veronii</i>   |
| 65 | AH84  | Skin mucous of apparently healthy platy fish     | <i>Aeromonas veronii</i>   |
| 66 | AE85  | Biofilm                                          | <i>Aeromonas veronii</i>   |
| 67 | AE86  | Biofilm                                          | <i>Aeromonas dhakensis</i> |
| 68 | AE87  | Effluent water                                   | <i>Aeromonas dhakensis</i> |
| 69 | AE88  | Pond sediment                                    | <i>Aeromonas veronii</i>   |
| 70 | AH90  | Skin mucous of apparently healthy guppy          | <i>Aeromonas veronii</i>   |
| 71 | AH91  | Skin mucous of apparently healthy goldfish       | <i>Aeromonas veronii</i>   |
| 72 | AE92  | Biofilm                                          | <i>Aeromonas veronii</i>   |
| 73 | AE93  | Effluent water                                   | <i>Aeromonas veronii</i>   |
| 74 | AE94  | Pond sediment                                    | <i>Aeromonas veronii</i>   |
| 75 | AE95  | Pond sediment                                    | <i>Aeromonas caviae</i>    |
| 76 | AH96  | Skin mucous of apparently healthy goldfish       | <i>Aeromonas veronii</i>   |
| 77 | AE97  | Effluent water                                   | <i>Aeromonas veronii</i>   |
| 78 | AE98  | Effluent water                                   | <i>Aeromonas veronii</i>   |
| 79 | AE99  | Pond sediment                                    | <i>Aeromonas veronii</i>   |
| 80 | AH100 | Skin mucous of apparently healthy guppy          | <i>Aeromonas veronii</i>   |
| 81 | AH101 | Skin mucous of apparently healthy goldfish       | <i>Aeromonas veronii</i>   |
| 82 | AE102 | Biofilm                                          | <i>Aeromonas veronii</i>   |
| 83 | AE103 | Effluent water                                   | <i>Aeromonas veronii</i>   |
| 84 | AE105 | Pond sediment                                    | <i>Aeromonas caviae</i>    |
| 85 | AH106 | Skin mucous of apparently healthy goldfish       | <i>Aeromonas veronii</i>   |
| 86 | AH107 | Skin mucous of apparently healthy platy fish     | <i>Aeromonas veronii</i>   |
| 87 | AE108 | Biofilm                                          | <i>Aeromonas veronii</i>   |
| 88 | AE111 | Pond sediment                                    | <i>Aeromonas veronii</i>   |
| 89 | AH112 | Skin mucous of apparently healthy goldfish       | <i>Aeromonas caviae</i>    |
| 90 | AH113 | Skin mucous of apparently healthy molly          | <i>Aeromonas caviae</i>    |
| 91 | AE115 | Biofilm                                          | <i>Aeromonas veronii</i>   |
| 92 | AE117 | Effluent water                                   | <i>Aeromonas veronii</i>   |
| 93 | AE118 | Effluent water                                   | <i>Aeromonas veronii</i>   |
| 94 | AE119 | Pond sediment                                    | <i>Aeromonas veronii</i>   |
| 95 | AE120 | Pond sediment                                    | <i>Aeromonas veronii</i>   |
| 96 | AH122 | Skin mucous of apparently healthy guppy          | <i>Aeromonas veronii</i>   |
| 97 | AE123 | Biofilm                                          | <i>Aeromonas veronii</i>   |
| 98 | AE125 | Effluent water                                   | <i>Aeromonas veronii</i>   |
| 99 | AE127 | Pond sediment                                    | <i>Aeromonas veronii</i>   |

|     |       |                                              |                             |
|-----|-------|----------------------------------------------|-----------------------------|
| 100 | AE130 | Biofilm                                      | <i>Aeromonas veronii</i>    |
| 101 | AE131 | Effluent water                               | <i>Aeromonas popoffii</i>   |
| 102 | AE132 | Pond sediment                                | <i>Aeromonas veronii</i>    |
| 103 | AE133 | Pond sediment                                | <i>Aeromonas veronii</i>    |
| 104 | AH134 | Skin mucous of apparently healthy platy fish | <i>Aeromonas veronii</i>    |
| 105 | AH135 | Skin mucous of apparently healthy guppy      | <i>Aeromonas dhakensis</i>  |
| 106 | AH136 | Skin mucous of apparently healthy guppy      | <i>Aeromonas dhakensis</i>  |
| 107 | AE138 | Effluent water                               | <i>Aeromonas veronii</i>    |
| 108 | AE141 | Pond sediment                                | <i>Aeromonas veronii</i>    |
| 109 | AE142 | Pond sediment                                | <i>Aeromonas veronii</i>    |
| 110 | AE144 | Pond sediment                                | <i>Aeromonas veronii</i>    |
| 111 | AH147 | Skin mucous of apparently healthy guppy      | <i>Aeromonas jandaei</i>    |
| 112 | AH149 | Skin mucous of apparently healthy guppy      | <i>Aeromonas veronii</i>    |
| 113 | AE150 | Biofilm                                      | <i>Aeromonas caviae</i>     |
| 114 | AE151 | Effluent water                               | <i>Aeromonas veronii</i>    |
| 115 | AE153 | Pond sediment                                | <i>Aeromonas veronii</i>    |
| 116 | AE154 | Pond sediment                                | <i>Aeromonas veronii</i>    |
| 117 | AE155 | Pond sediment                                | <i>Aeromonas sobria</i>     |
| 118 | AH156 | Skin mucous of apparently healthy guppy      | <i>Aeromonas veronii</i>    |
| 119 | AE157 | Biofilm                                      | <i>Aeromonas veronii</i>    |
| 120 | AE159 | Effluent water                               | <i>Aeromonas veronii</i>    |
| 121 | AE160 | Effluent water                               | <i>Aeromonas veronii</i>    |
| 122 | AE163 | Pond sediment                                | <i>Aeromonas veronii</i>    |
| 123 | AH164 | Skin mucous of apparently healthy guppy      | <i>Aeromonas veronii</i>    |
| 124 | AE165 | Biofilm                                      | <i>Aeromonas jandaei</i>    |
| 125 | AE167 | Biofilm                                      | <i>Aeromonas veronii</i>    |
| 126 | AC1   | Wound swab of giant gourami                  | <i>Aeromonas dhakensis</i>  |
| 127 | AC3   | Wound swab of giant gourami                  | <i>Aeromonas hydrophila</i> |
| 128 | AC4   | Wound swab of giant gourami                  | <i>Aeromonas hydrophila</i> |
| 129 | AC7   | Kidney culture of guppy                      | <i>Aeromonas jandaei</i>    |
| 130 | AC8   | Kidney culture of guppy                      | <i>Aeromonas jandaei</i>    |
| 131 | AC9   | Wound swab of giant gourami                  | <i>Aeromonas hydrophila</i> |
| 132 | AC11  | Wound swab of platy                          | <i>Aeromonas hydrophila</i> |
| 133 | AC12  | Kidney culture of platy                      | <i>Aeromonas hydrophila</i> |
| 134 | AC14  | Kidney culture of platy                      | <i>Aeromonas hydrophila</i> |
| 135 | AC15  | Kidney culture of platy                      | <i>Aeromonas hydrophila</i> |
| 136 | AC16  | Wound swab of giant gourami                  | <i>Aeromonas veronii</i>    |
| 137 | AC17  | Kidney culture of koi carp                   | <i>Aeromonas veronii</i>    |
| 138 | AC18  | Kidney culture of koi carp                   | <i>Aeromonas veronii</i>    |
| 139 | AC19  | Kidney culture of discus                     | <i>Aeromonas veronii</i>    |
| 140 | AC21  | Wound swab of silver dollar                  | <i>Aeromonas veronii</i>    |
| 141 | AC22  | Wound swab of silver dollar                  | <i>Aeromonas veronii</i>    |
| 142 | AC23  | Kidney culture of goldfish                   | <i>Aeromonas veronii</i>    |
| 143 | AC25  | Kidney culture of platy                      | <i>Aeromonas veronii</i>    |
| 144 | AC26  | Kidney culture of platy                      | <i>Aeromonas veronii</i>    |
| 145 | AC27  | Kidney culture of Oscar                      | <i>Aeromonas hydrophila</i> |
| 146 | AC29  | Kidney culture of guppy                      | <i>Aeromonas veronii</i>    |
| 147 | AC30  | Kidney culture of guppy                      | <i>Aeromonas veronii</i>    |
| 148 | AC31  | Kidney culture of guppy                      | <i>Aeromonas veronii</i>    |
| 149 | AC32  | Kidney culture of guppy                      | <i>Aeromonas veronii</i>    |
| 150 | AC34  | Kidney culture of goldfish                   | <i>Aeromonas veronii</i>    |

|     |       |                             |                             |
|-----|-------|-----------------------------|-----------------------------|
| 151 | AC35  | Kidney culture of goldfish  | <i>Aeromonas hydrophila</i> |
| 152 | AC36  | Kidney culture of goldfish  | <i>Aeromonas jandaei</i>    |
| 153 | AC37  | Kidney culture of goldfish  | <i>Aeromonas veronii</i>    |
| 154 | AC39  | Wound swab of Oscar         | <i>Aeromonas hydrophila</i> |
| 155 | AC40  | Kidney culture of goldfish  | <i>Aeromonas jandaei</i>    |
| 156 | AC42  | Kidney culture of guppy     | <i>Aeromonas jandaei</i>    |
| 157 | AC43  | Wound swab of giant gourami | <i>Aeromonas hydrophila</i> |
| 158 | AC44  | Wound swab of goldfish      | <i>Aeromonas dhakensis</i>  |
| 159 | AC45  | Kidney culture of guppy     | <i>Aeromonas veronii</i>    |
| 160 | AC46  | Wound swab of giant gourami | <i>Aeromonas hydrophila</i> |
| 161 | AE168 | Effluent water              | <i>Aeromonas hydrophila</i> |
