# Supplementary material for: Characterization and Antimicrobial Resistance of Environmental and Clinical Aeromonas Species Isolated from Fresh Water Ornamental Fish and Associated Farming Environment in Sri Lanka
Source: MDPI journal article supplement (doi:10.3390/microorganisms9102106), 2021-10-06
Supplement: s1 [file s1]

**Table S2.** Characterization of integrons and integron gene cassettes (class 1 and class 2) in integron carrying *Aeromonas* isolates (n=36)

| Isolate | Species                     | Integron<br>Integrase<br>PCR | Integrase 1<br>PCR | Amplicon size of<br>class 1 integron<br>gene cassette (bp) | Amplicon size of<br>class 2 integron<br>gene cassette (bp) |
|---------|-----------------------------|------------------------------|--------------------|------------------------------------------------------------|------------------------------------------------------------|
| AH37    | <i>Aeromonas media</i>      | +                            | +                  | 800                                                        |                                                            |
| AE41    | <i>Aeromonas caviae</i>     | -                            | +                  | 250                                                        | 1200                                                       |
| AE52    | <i>Aeromonas veronii</i>    | +                            | +                  | 1200                                                       |                                                            |
| AH57    | <i>Aeromonas veronii</i>    | +                            | +                  | 1200                                                       |                                                            |
| AH58    | <i>Aeromonas veronii</i>    | +                            | +                  | 1200                                                       | 800                                                        |
| AH63    | <i>Aeromonas veronii</i>    | +                            | +                  | 1800                                                       |                                                            |
| AE81    | <i>Aeromonas veronii</i>    | -                            | +                  |                                                            | 800                                                        |
| AH83    | <i>Aeromonas veronii</i>    | +                            | +                  | 250                                                        |                                                            |
| AH90    | <i>Aeromonas veronii</i>    | +                            | +                  | 800                                                        | 850                                                        |
| AH91    | <i>Aeromonas veronii</i>    | +                            | +                  | 900                                                        |                                                            |
| AH96    | <i>Aeromonas veronii</i>    | +                            | -                  | 1800                                                       |                                                            |
| AE118   | <i>Aeromonas veronii</i>    | +                            | +                  | 900                                                        |                                                            |
| AE120   | <i>Aeromonas veronii</i>    | +                            | +                  | 900                                                        | 1800                                                       |
| AE125   | <i>Aeromonas veronii</i>    | +                            | +                  | 800                                                        | 600                                                        |
| AE132   | <i>Aeromonas veronii</i>    | +                            | +                  | 1800                                                       |                                                            |
| AE133   | <i>Aeromonas veronii</i>    | +                            | +                  | 1500                                                       |                                                            |
| AH135   | <i>Aeromonas dhakensis</i>  | +                            | +                  | 1800                                                       |                                                            |
| AH136   | <i>Aeromonas dhakensis</i>  | +                            | +                  | 2000                                                       |                                                            |
| AE141   | <i>Aeromonas veronii</i>    | -                            | +                  | 1100                                                       | 800                                                        |
| AE144   | <i>Aeromonas veronii</i>    | +                            | +                  | 800                                                        |                                                            |
| AH147   | <i>Aeromonas jandaei</i>    | +                            | +                  | 1350                                                       | 1800                                                       |
| AE153   | <i>Aeromonas veronii</i>    | +                            | +                  | 750                                                        |                                                            |
| AE154   | <i>Aeromonas veronii</i>    | +                            | +                  | 750                                                        |                                                            |
| AE155   | <i>Aeromonas sobria</i>     | -                            | +                  | 750                                                        |                                                            |
| AE157   | <i>Aeromonas veronii</i>    | +                            | +                  | 750                                                        |                                                            |
| AH164   | <i>Aeromonas veronii</i>    | +                            | +                  | 1800                                                       |                                                            |
| AE167   | <i>Aeromonas veronii</i>    | +                            | +                  | 750                                                        |                                                            |
| AC1     | <i>Aeromonas dhakensis</i>  | +                            | -                  |                                                            | 1100                                                       |
| AC7     | <i>Aeromonas. jandaei</i>   | +                            | +                  | 1800                                                       |                                                            |
| AC8     | <i>Aeromonas jandaei</i>    | +                            | +                  | 1800                                                       |                                                            |
| AC11    | <i>Aeromonas hydrophila</i> | +                            | +                  | 1800                                                       |                                                            |
| AC12    | <i>Aeromonas hydrophila</i> | +                            | +                  | 1800                                                       |                                                            |
| AC16    | <i>Aeromonas veronii</i>    | +                            | +                  | 1800                                                       | 800                                                        |
| AC25    | <i>Aeromonas veronii</i>    | +                            | +                  | 1100                                                       |                                                            |
| AC31    | <i>Aeromonas veronii</i>    | +                            | +                  | 1500                                                       | 450                                                        |
| AC42    | <i>Aeromonas jandaei</i>    | +                            | +                  | 1300                                                       | 1800                                                       |
